# Supplementary material for: Dietary Patterns and Blood Biochemical and Metabolic Parameters in an Italian Population: A Cross-Sectional Study
Source: MDPI journal article supplement (doi:10.3390/dietetics1020010), 2022-08-05
Supplement: s1 [file s1]

## Supplementary Material

**Table S1.** Laboratory reference ranges for blood biochemical and metabolic parameters.

| <b>Complete Blood Count</b> | <b>Reference Ranges/Unit</b>      |
|-----------------------------|-----------------------------------|
| White Blood Cell Count      | 4.0–10.0 × 10 <sup>3</sup> /μL    |
| Neutrophils                 | 1.6–7.5 × 10 <sup>3</sup> /μL     |
| Lymphocytes                 | 0.80–4.50 × 10 <sup>3</sup> /μL   |
| Monocytes                   | 0.08–1.00 × 10 <sup>3</sup> /μL   |
| Eosinophils                 | 0.04–0.60 × 10 <sup>3</sup> /μL   |
| Basophils                   | 0.00–0.15 × 10 <sup>3</sup> /μL   |
| Red Blood Cell Count        | 4.5–6.0 × 10 <sup>9</sup> /μL     |
| Hemoglobin                  | 14.0–17.5 g/dL                    |
| Hematocrit                  | 40.0–52.0 %                       |
| MCV                         | 80.0–95.0 fL                      |
| MCH                         | 26.0–32.0 pg                      |
| MCHC                        | 32.5–36.0 g/dL                    |
| RDW                         | 11.5–14.1%                        |
| Platelets                   | 150.0–450.0 × 10 <sup>3</sup> /μL |
| Ferritin                    | 22–275 ng/mL                      |
| ALT                         | 4–49 U/L                          |
| Glycemia                    | 60–110 mg/dL                      |
| Total cholesterol           | 130–200 mg/dL                     |
| LDL-cholesterol             | 10–120 mg/dL                      |
| HDL-cholesterol             | 40–90 mg/dL                       |
| Triglycerides               | 30.0–180.0 mg/dL                  |
| Creatinine                  | 0.7–1.3 mg/dL                     |
| TSH                         | 0.35–4.50 mU/mL                   |
| Total protein               | 6.4–8.3 g/dL                      |

**Table S2.** Mean and standard deviation of dietary intake of food and beverages of the overall population and divided by sex. Values are expressed in g/day.

| <b>Foods</b>                                | <b>All (N=137)</b> | <b>Men (N=62)</b> | <b>Women (N=75)</b> |
|---------------------------------------------|--------------------|-------------------|---------------------|
| Total energy intake (kcal/day)              | 2039 (690)         | 2190 (789)        | 1915 (573)          |
| Cereals and cereal products                 | 213.1 (146.7)      | 240.2 (177.4)     | 190.7 (111.9)       |
| Pasta, other grains                         | 49.8 (37.8)        | 61.6 (45.3)       | 40.0 (26.9)         |
| Rice                                        | 7.9 (8.2)          | 9.0 (9.7)         | 6.9 (6.7)           |
| Bread and rolls                             | 91.5 (127.7)       | 108.0 (154.2)     | 77.9 (99.7)         |
| Crackers, crispbread, salty snacks          | 26.4 (23.9)        | 23.7 (21.4)       | 28.7 (25.7)         |
| Pizza                                       | 37.5 (18.9)        | 38.0 (20.5)       | 37.1 (17.5)         |
| Meat and meat products                      | 72.4 (49.0)        | 88.0 (58.7)       | 59.5 (34.6)         |
| Red meat                                    | 47.3 (34.8)        | 54.8 (41.9)       | 41.1 (26.4)         |
| White meat                                  | 29.6 (26.3)        | 27.7 (30.3)       | 30.2 (22.7)         |
| Processed meat                              | 29.4 (22.5)        | 37.7 (27.8)       | 22.6 (13.6)         |
| Offal                                       | 0.8 (2.0)          | 1.1 (2.7)         | 0.5 (1.2)           |
| Milk and dairy products                     | 180.2 (178.6)      | 167.2 (161.8)     | 191.0 (191.7)       |
| Milk                                        | 87.2 (163.2)       | 80.3 (148.6)      | 92.9 (175.2)        |
| Yogurt                                      | 48.3 (61.7)        | 39.4 (53.8)       | 55.8 (66.9)         |
| Cheese                                      | 44.7 (37.5)        | 47.5 (40.3)       | 42.3 (35.2)         |
| Fresh cheese                                | 17.2 (17.6)        | 16.1 (17.3)       | 18.1 (18.0)         |
| Aged cheese                                 | 27.5 (27.1)        | 31.4 (31.6)       | 24.2 (22.5)         |
| Eggs                                        | 16.1 (13.3)        | 16.3 (16.3)       | 16.0 (10.4)         |
| Fish and seafood                            | 44.8 (36.3)        | 47.2 (33.7)       | 42.9 (38.5)         |
| Fish                                        | 36.5 (30.8)        | 39.3 (32.1)       | 34.1 (29.7)         |
| Preserved and tinned fish                   | 13.2 (13.0)        | 14.3 (12.5)       | 12.4 (13.4)         |
| Non-piscivorous fish                        | 11.1 (14.8)        | 11.3 (17.2)       | 10.9 (12.7)         |
| Piscivorous fish                            | 12.2 (15.1)        | 13.8 (16.9)       | 10.9 (13.4)         |
| Crustaceans and molluscs                    | 8.3 (12.5)         | 7.9 (8.2)         | 8.7 (15.2)          |
| All vegetables                              | 164.5 (91.7)       | 145.3 (80.8)      | 180.4 (97.5)        |
| Leafy vegetables                            | 35.5 (26.1)        | 31.2 (25.1)       | 39.1 (26.6)         |
| Tomatoes                                    | 65.1 (51.5)        | 61.1 (49.9)       | 68.3 (53.0)         |
| Root vegetables                             | 33.3 (28.5)        | 28.1 (24.9)       | 37.6 (30.7)         |
| Cabbage                                     | 5.8 (7.9)          | 4.6 (7.9)         | 6.9 (7.7)           |
| Onion and garlic                            | 16.6 (18.9)        | 15.0 (18.9)       | 18.0 (18.9)         |
| Other vegetables (eggplant, zucchini, etc.) | 24.8 (18.8)        | 20.3 (16.4)       | 28.6 (20.0)         |
| Mushrooms                                   | 2.8 (3.3)          | 2.4 (2.5)         | 3.1 (3.8)           |
| Pulses                                      | 22.6 (23.6)        | 21.1 (23.7)       | 23.9 (23.7)         |
| Potatoes                                    | 21.5 (22.2)        | 22.6 (26.1)       | 20.5 (18.4)         |
| Fresh fruit                                 | 248.8 (169.1)      | 241.1 (201.9)     | 255.1 (137.2)       |
| Citrus fruit                                | 56.7 (53.7)        | 56.2 (59.8)       | 57.0 (48.5)         |
| All other fruit                             | 187.7 (128.5)      | 181.4 (155.1)     | 192.9 (102.2)       |
| Dry fruit, nuts and seeds                   | 4.4 (4.4)          | 3.5 (3.6)         | 5.1 (4.8)           |
| Dry fruits                                  | 0.5 (1.4)          | 0.3 (0.5)         | 0.6 (1.8)           |
| Nuts and seeds                              | 3.9 (3.9)          | 3.2 (3.6)         | 4.5 (4.0)           |
| Sweets, chocolate, cakes, etc.              | 96.1 (61.5)        | 97.4 (57.6)       | 95.1 (64.9)         |
| Sugar, non-chocolate confectionery          | 17.0 (20.1)        | 16.2 (22.0)       | 17.7 (18.6)         |
| Chocolate, candy bars, etc.                 | 8.9 (11.0)         | 8.0 (8.9)         | 9.5 (12.5)          |

---

|                                      |               |               |               |
|--------------------------------------|---------------|---------------|---------------|
| Ice-cream                            | 12.1 (10.9)   | 12.8 (12.1)   | 11.5 (9.8)    |
| Cakes, pies and pastries             | 42.1 (42.2)   | 43.1 (34.7)   | 41.3 (47.7)   |
| Biscuits, dry cakes                  | 16.1 (22.3)   | 17.3 (28.1)   | 15.1 (16.1)   |
| Oils and fats                        | 28.0 (12.7)   | 27.6 (12.8)   | 28.2 (12.7)   |
| Vegetables fats and oils (non-olive) | 2.2 (3.1)     | 2.4 (3.4)     | 2.0 (2.8)     |
| Olive oil                            | 23.0 (12.2)   | 22.1 (11.8)   | 23.7 (12.6)   |
| Butter and other animal fats         | 2.5 (2.8)     | 2.8 (3.0)     | 2.2 (2.7)     |
| Beverages                            | 341.8 (198.8) | 396.4 (208.9) | 296.7 (179.2) |
| Coffee and tea                       | 133.4 (99.0)  | 126.5 (79.7)  | 139.1 (112.7) |
| Wine                                 | 91.2 (125.2)  | 132.8 (155.5) | 56.8 (78.8)   |
| Red wine                             | 58.2 (92.2)   | 92.8 (119.0)  | 29.6 (46.0)   |
| White wine                           | 33.0 (63.8)   | 40.0 (79.5)   | 27.1 (46.8)   |
| Aperitif wine and beer               | 48.7 (78.9)   | 62.2 (71.3)   | 37.5 (83.4)   |
| Spirits and liqueurs                 | 2.9 (7.3)     | 3.7 (6.4)     | 2.2 (7.9)     |
| Fruit juices                         | 37.0 (57.5)   | 37.6 (62.3)   | 36.4 (53.5)   |
| Soft drinks                          | 28.8 (47.7)   | 33.5 (51.8)   | 24.8 (43.9)   |

---

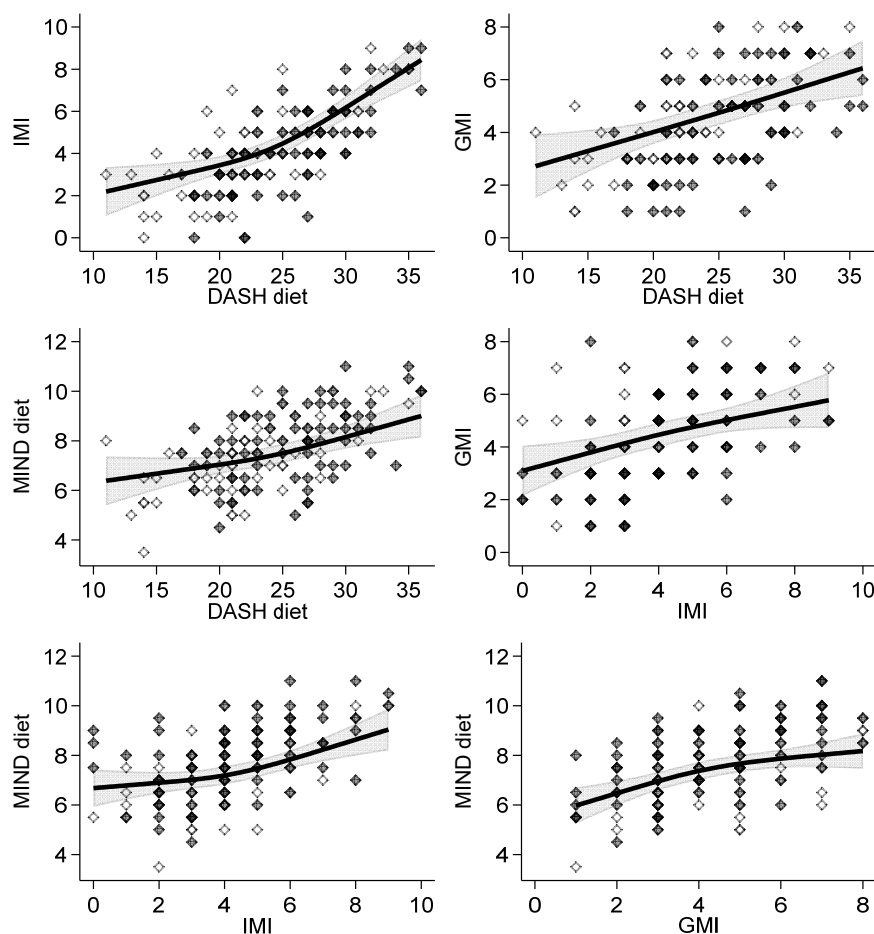

**Figure S1.** Spline regression analysis of the associations between indices of adherence to the different dietary patterns in the study population. Hollow and solid diamonds indicate men and women, respectively (Dietary Approaches to Stop Hypertension-DASH diet; Greek Mediterranean Index-GMI; Italian Mediterranean Index-IMI; Mediterranean-DASH Intervention for Neurodegenerative Delay-MIND diet). Solid line indicates multivariable analysis adjusted for age, sex, body mass index, urinary cotinine, alcohol intake, fiber intake and total energy intake, while shaded area represents confidence interval with upper and lower limits.



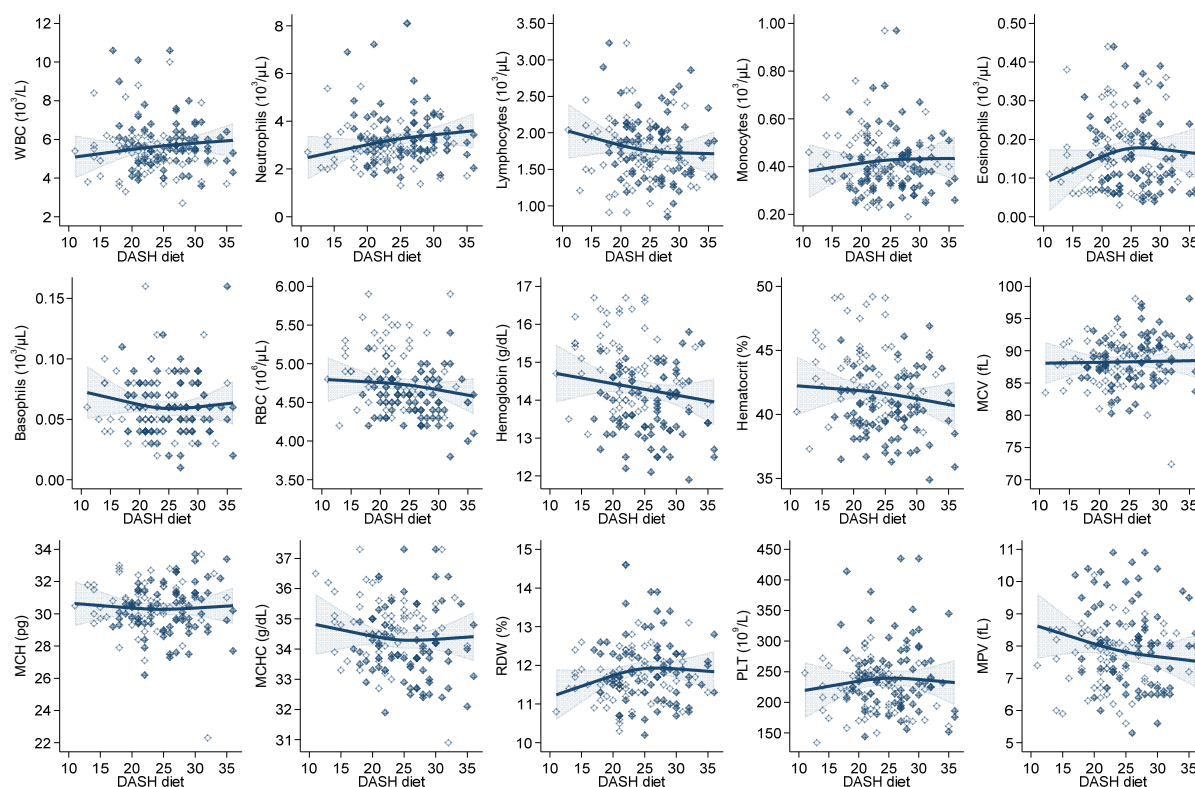

**Figure S2.** Spline regression analysis of the associations between adherence to the Dietary Approaches to Stop Hypertension (DASH) diet with blood cell count and biochemistry in the study population. Hollow and solid diamonds indicate men and women, respectively. Solid line indicates multivariable analysis adjusted for age, sex, body mass index, urinary cotinine, alcohol intake, fiber intake and total energy intake, while shaded area represents confidence interval with upper and lower limits.

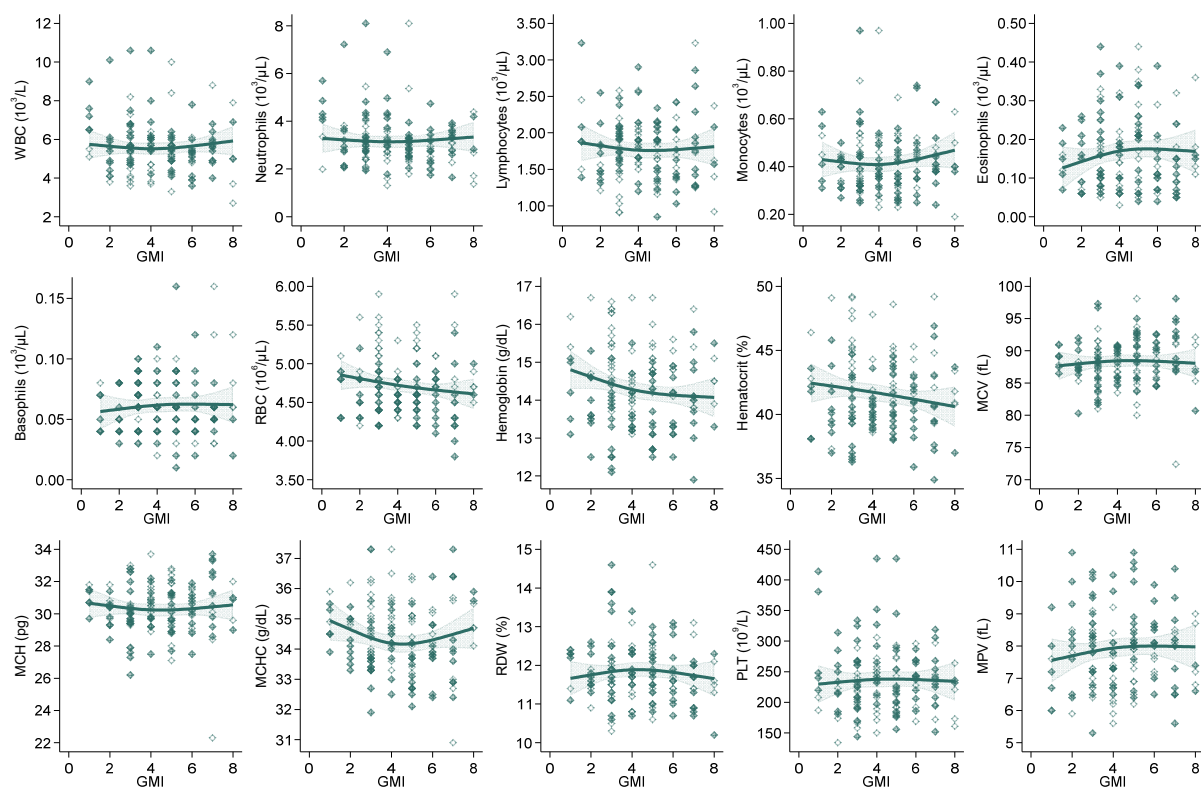

**Figure S3.** Spline regression analysis of the associations between adherence to the Greek Mediterranean Index (GMI) with blood cell count and biochemistry in the study population. Hollow and solid diamonds indicate men and women, respectively. Solid line indicates multivariable analysis adjusted for age, sex, body mass index, urinary cotinine, alcohol intake, fiber intake and total energy intake, while shaded area represents confidence interval with upper and lower limits.

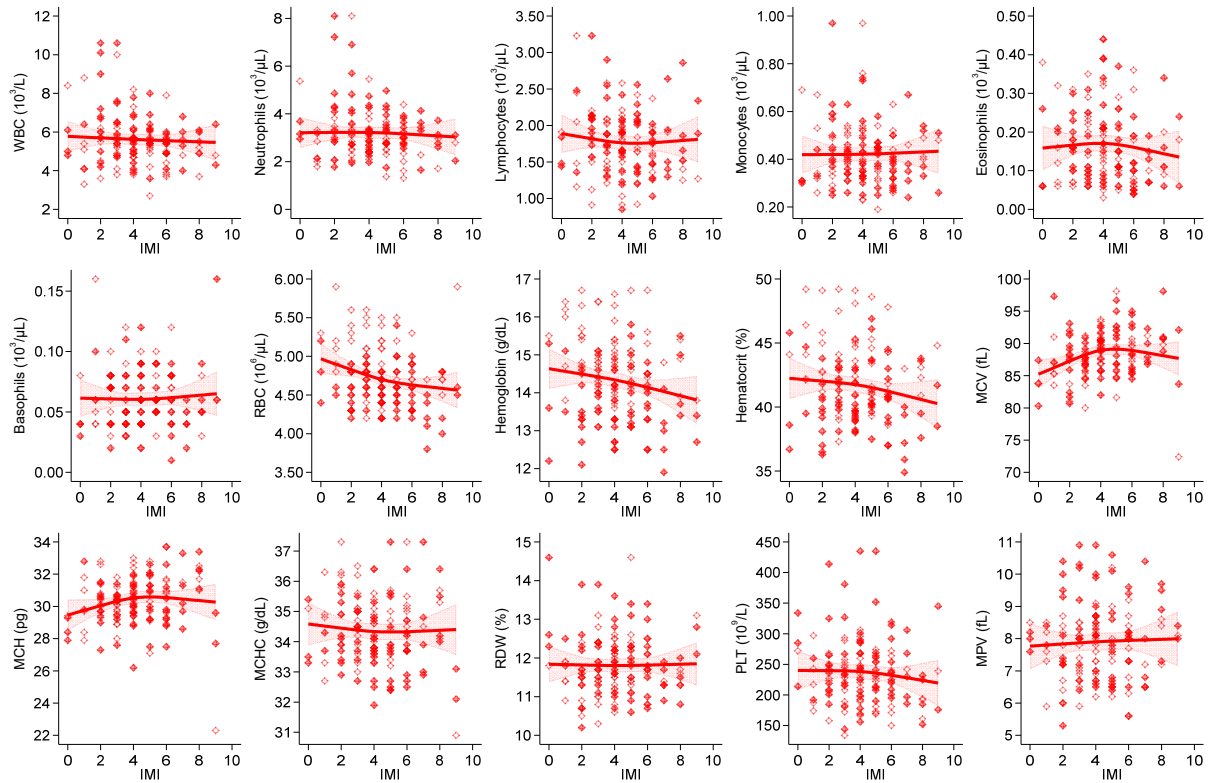

**Figure S4.** Spline regression analysis of the associations between adherence to the Italian Mediterranean Index (IMI) with blood cell count and biochemistry in the study population. Hollow and solid diamonds indicate men and women, respectively. Solid line indicates multivariable analysis adjusted for age, sex, body mass index, urinary cotinine, alcohol intake, fiber intake and total energy intake, while shaded area represents confidence interval with upper and lower limits.

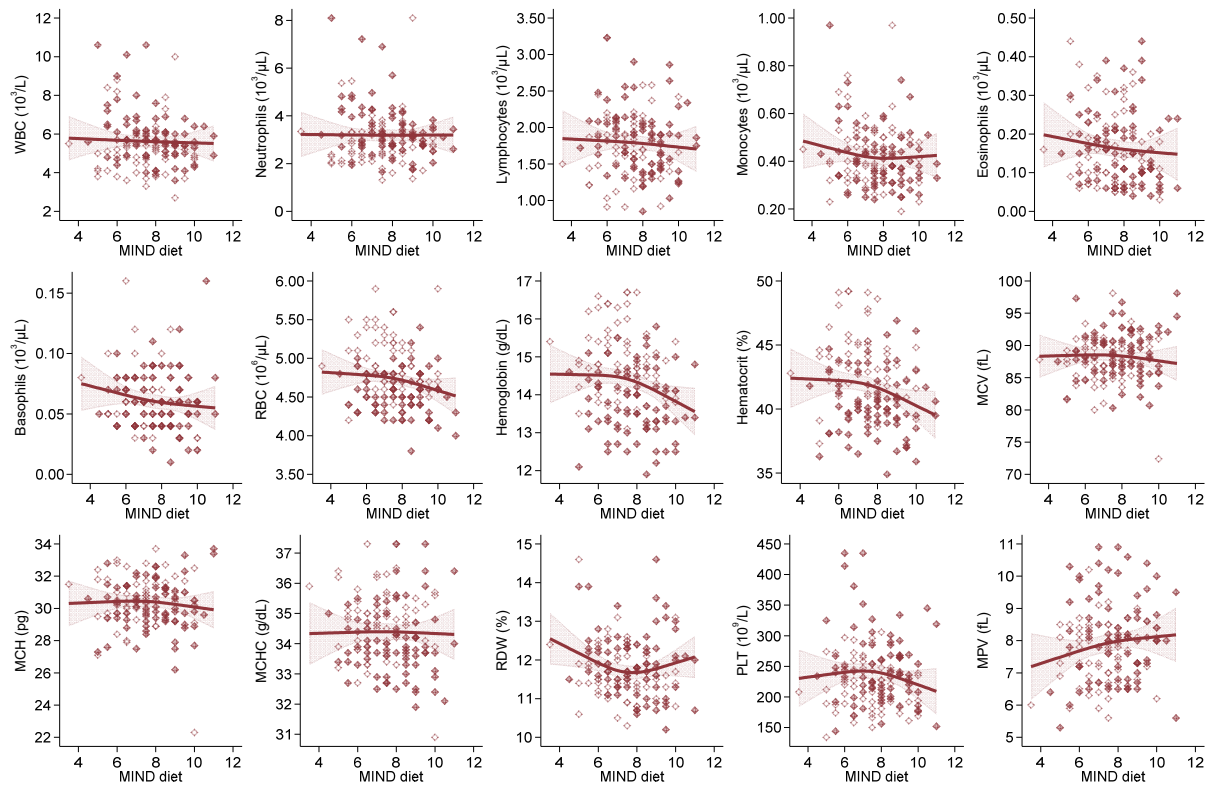

**Figure S5.** Spline regression analysis of the associations between adherence to the Mediterranean-DASH Intervention for Neurodegenerative Delay (MIND) diet with blood cell count and biochemistry in the study population. Hollow and solid diamonds indicate men and women, respectively. Solid line indicates multivariable analysis adjusted for age, sex, body mass index, urinary cotinine, alcohol intake, fiber intake and total energy intake, while shaded area represents confidence interval with upper and lower limits.

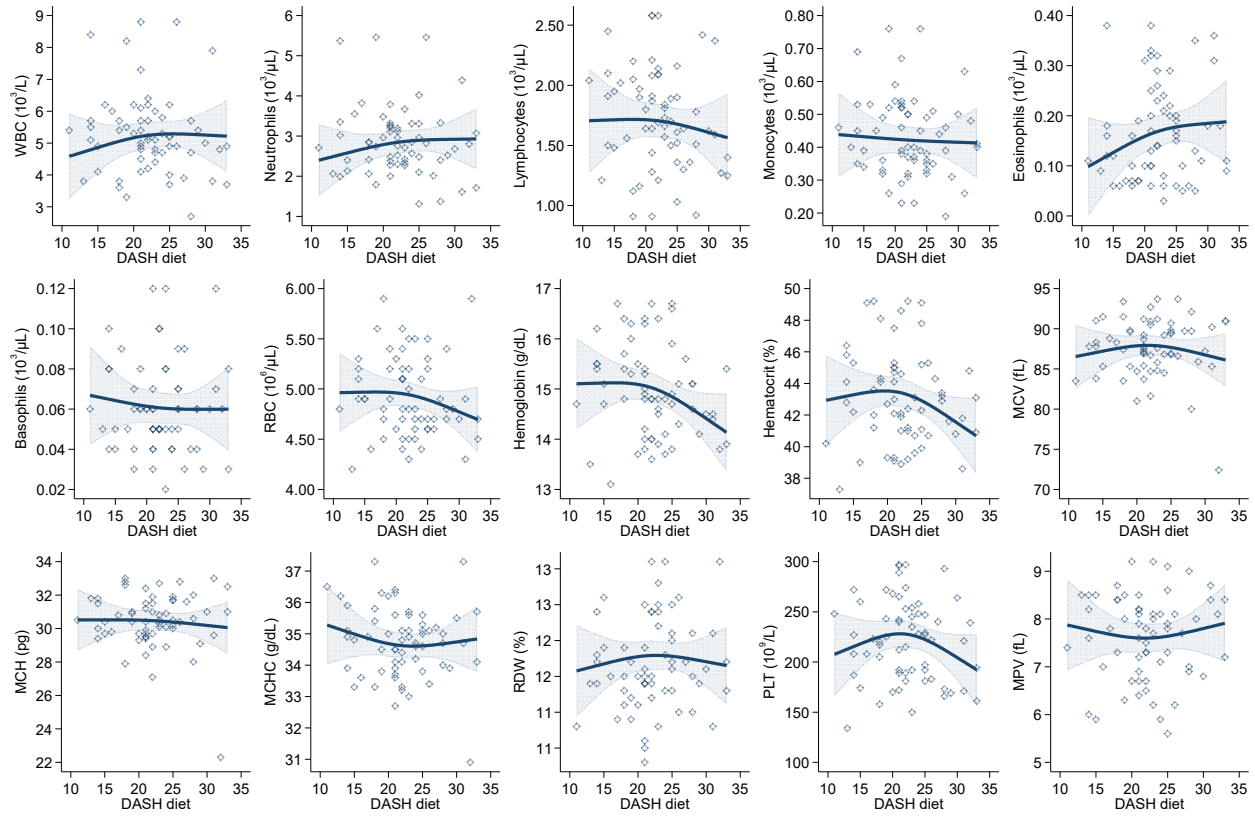

**Figure S6.** Spline regression analysis of the association between adherence to the Dietary Approaches to Stop Hypertension (DASH) diet with blood cell count and biochemistry in men. Solid line indicates multivariable analysis adjusted for age, sex, body mass index, urinary cotinine, alcohol intake, fiber intake and total energy intake, while shaded area represents confidence interval with upper and lower limits.

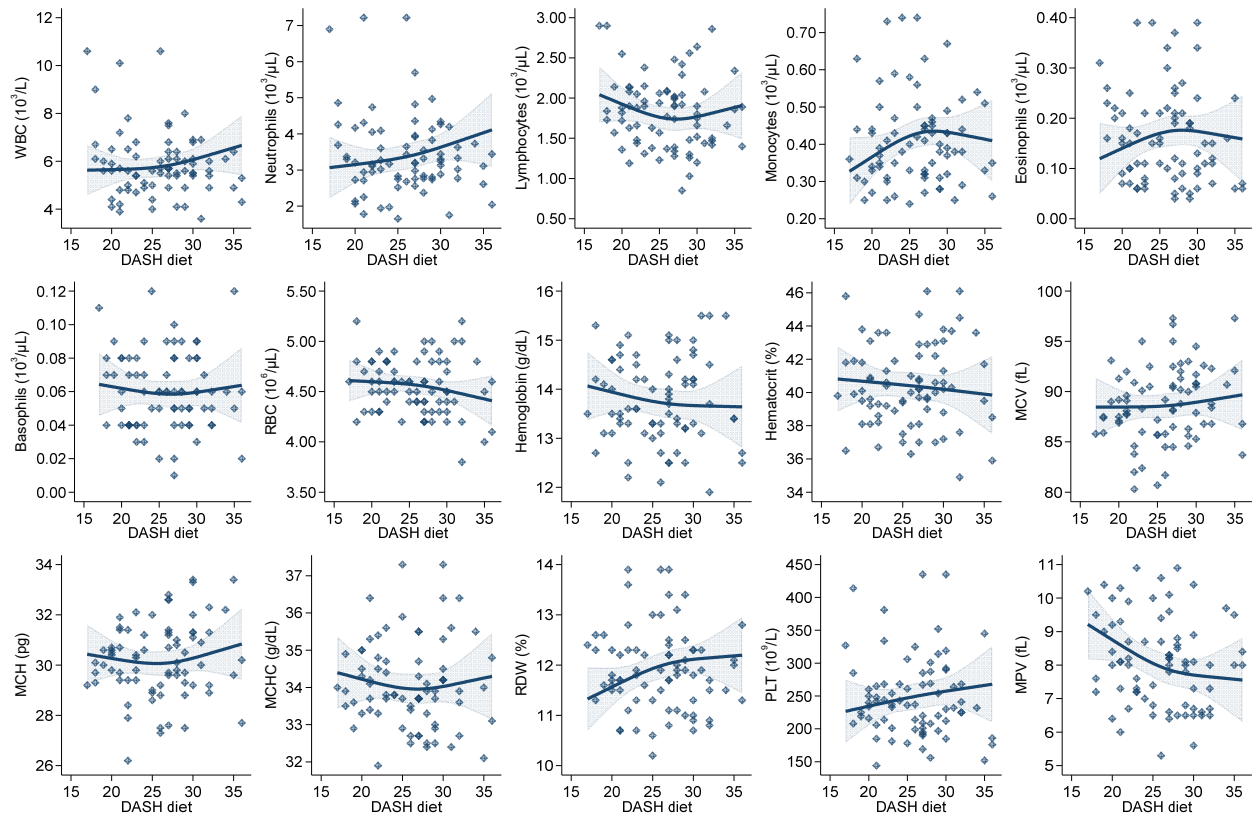

**Figure S7.** Spline regression analysis of the association between adherence to the Dietary Approaches to Stop Hypertension (DASH) diet with blood cell count and biochemistry in women. Solid line indicates multivariable analysis adjusted for age, sex, body mass index, urinary cotinine, alcohol intake, fiber intake and total energy intake, while shaded area represents confidence interval with upper and lower limits.

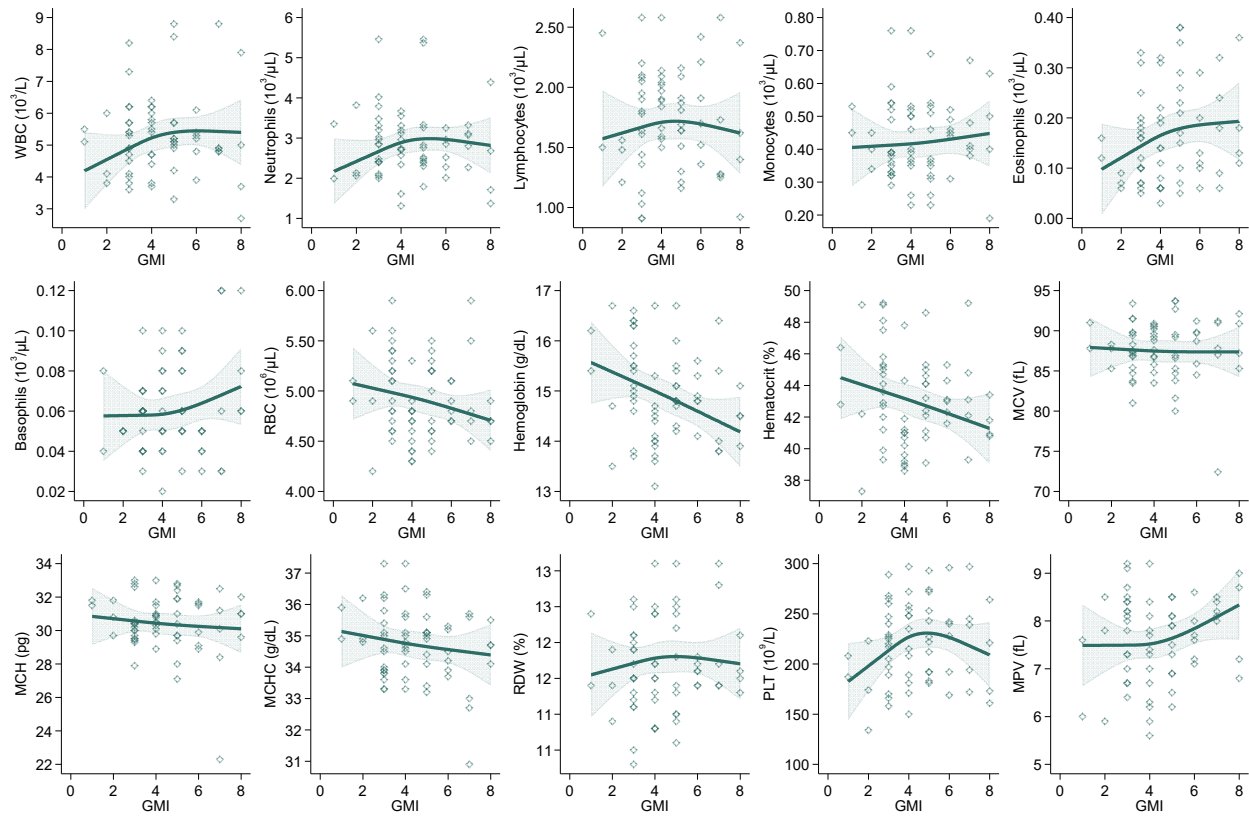

**Figure S8.** Spline regression analysis of the association between adherence to the Greek Mediterranean Index (GMI) with blood cell count and biochemistry in men. Solid line indicates multivariable analysis adjusted for age, sex, body mass index, urinary cotinine, alcohol intake, fiber intake and total energy intake, while shaded area represents confidence interval with upper and lower limits.

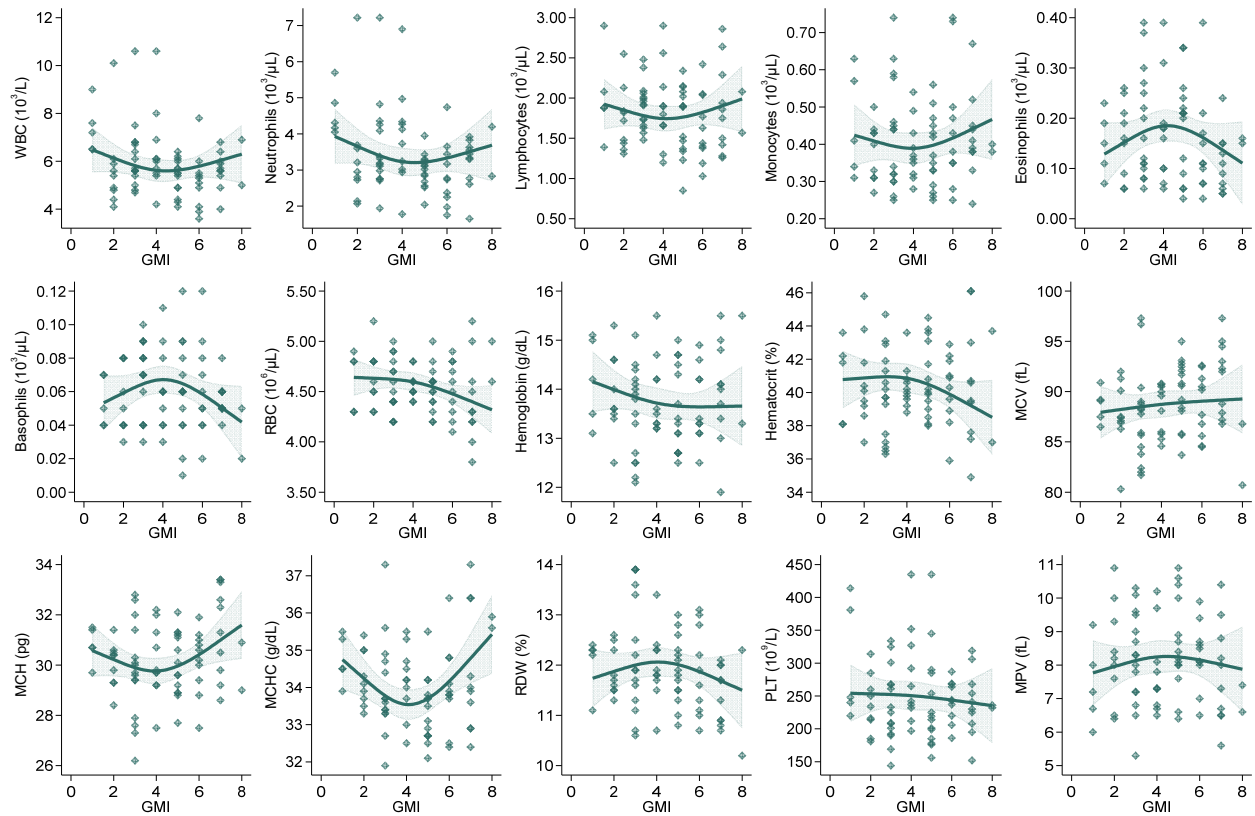

**Figure S9.** Spline regression analysis of the association between adherence to the Greek Mediterranean Index (GMI) with blood cell count and biochemistry in women. Solid line indicates multivariable analysis adjusted for age, sex, body mass index, urinary cotinine, alcohol intake, fiber intake and total energy intake, while shaded area represents confidence interval with upper and lower limits.



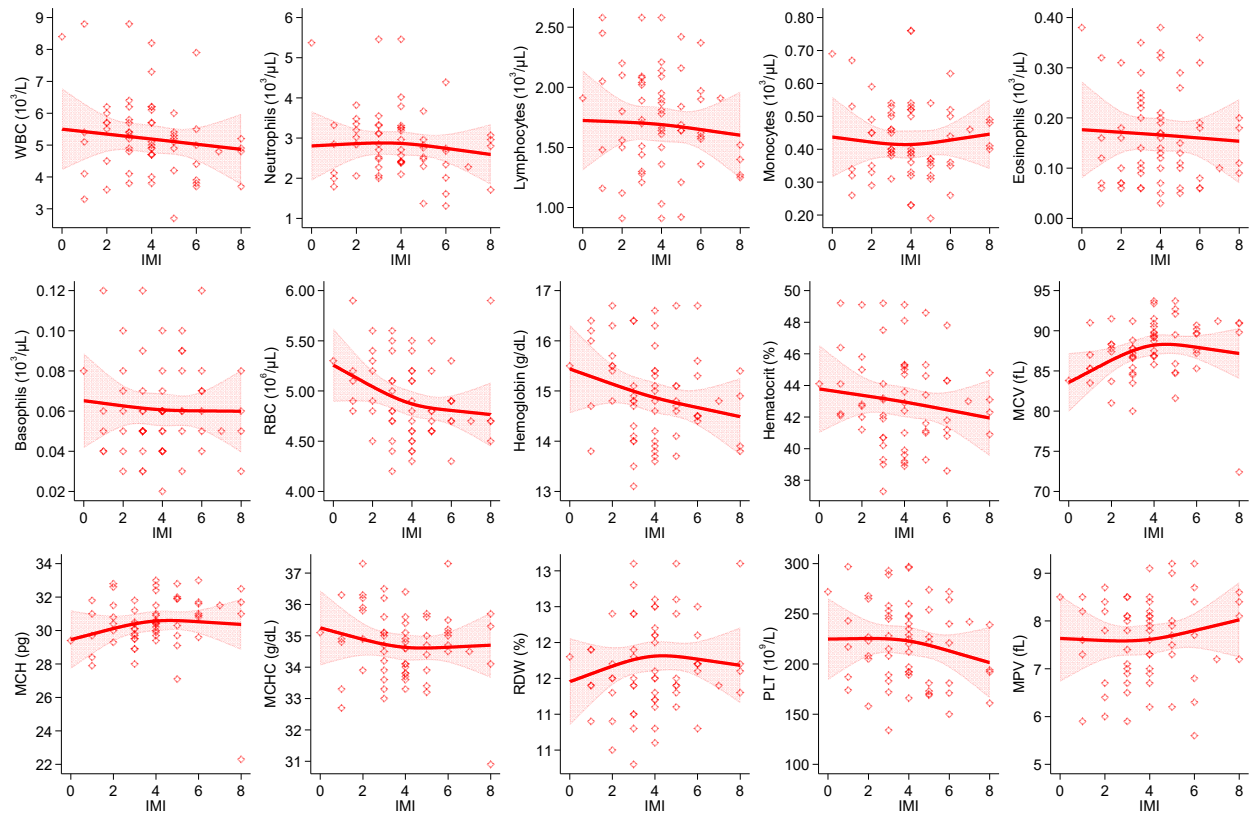

**Figure S10.** Spline regression analysis of the association between adherence to the Italian Mediterranean Index (IMI) with blood cell count and biochemistry in men. Solid line indicates multivariable analysis adjusted for age, sex, body mass index, urinary cotinine, alcohol intake, fiber intake and total energy intake, while shaded area represents confidence interval with upper and lower limits.

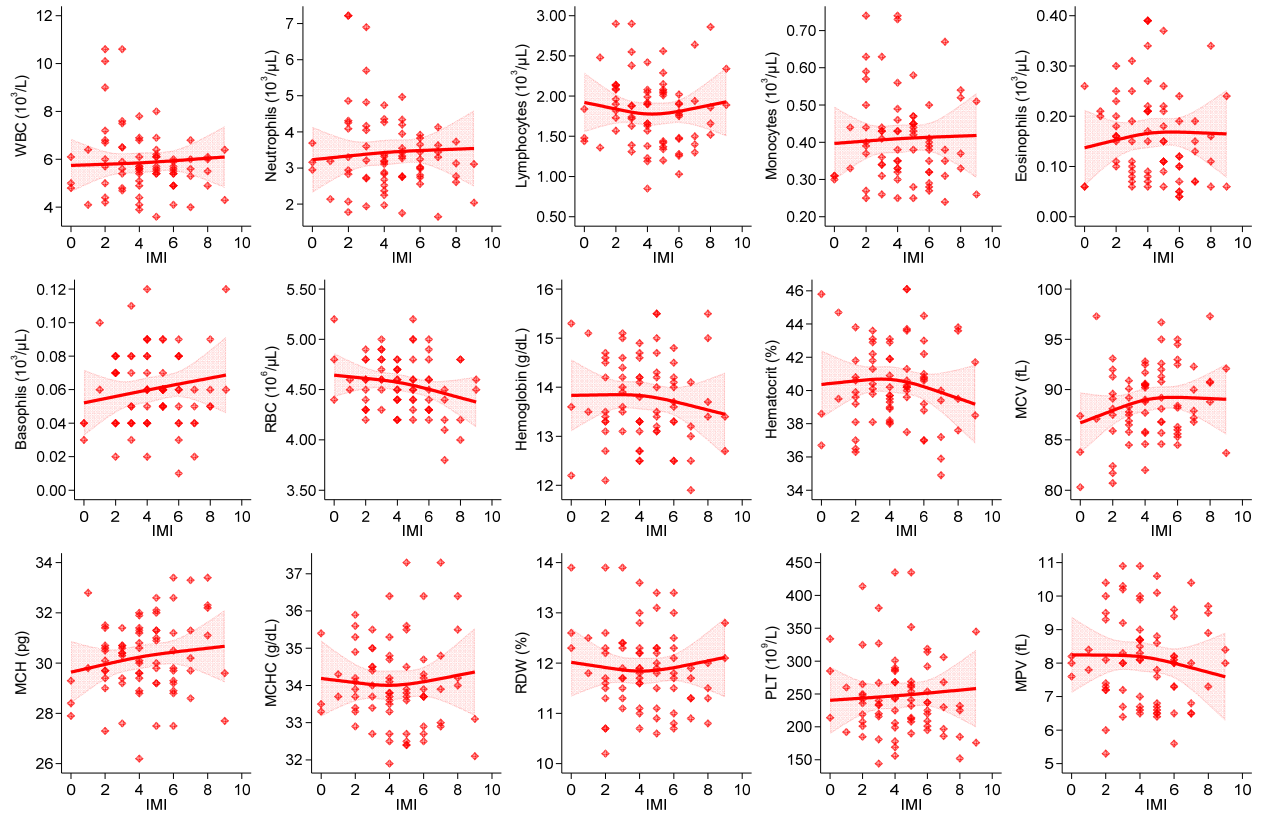

**Figure S11.** Spline regression analysis of the association between adherence to the Italian Mediterranean Index (IMI) in women. Solid line indicates multivariable analysis adjusted for age, sex, body mass index, urinary cotinine, alcohol intake, fiber intake and total energy intake, while shaded area represents confidence interval with upper and lower limits.

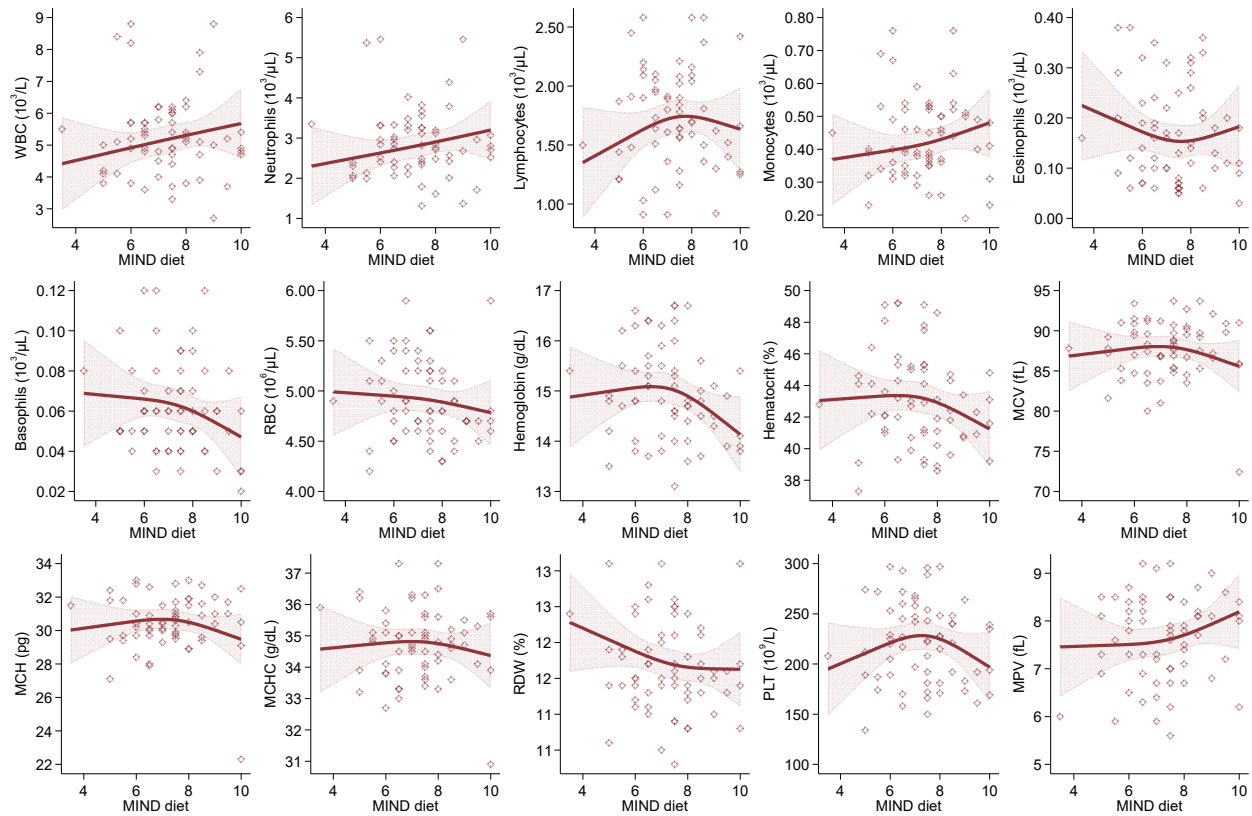

**Figure S12.** Spline regression analysis of the association between adherence to the Mediterranean-DASH Intervention for Neurodegenerative Delay (MIND) diet with blood cell count and biochemistry in men. Solid line indicates multivariable analysis adjusted for age, sex, body mass index, urinary cotinine, alcohol intake, fiber intake and total energy intake, while shaded area represents confidence interval with upper and lower limits.

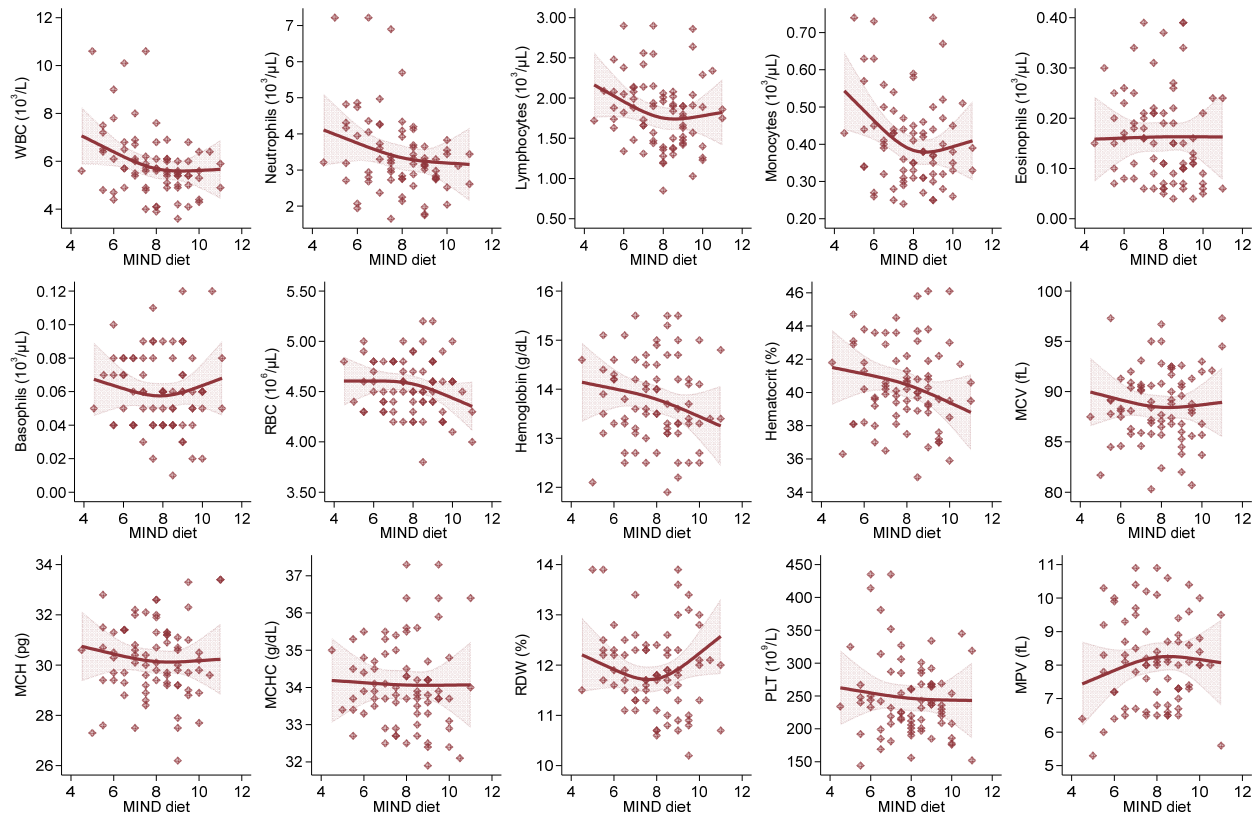

**Figure S13.** Spline regression analysis of the association between adherence to the Mediterranean-DASH Intervention for Neurodegenerative Delay (MIND) diet with blood cell count and biochemistry in women. Solid line indicates multivariable analysis adjusted for age, sex, body mass index, urinary cotinine, alcohol intake, fiber intake and total energy intake, while shaded area represents confidence interval with upper and lower limits.

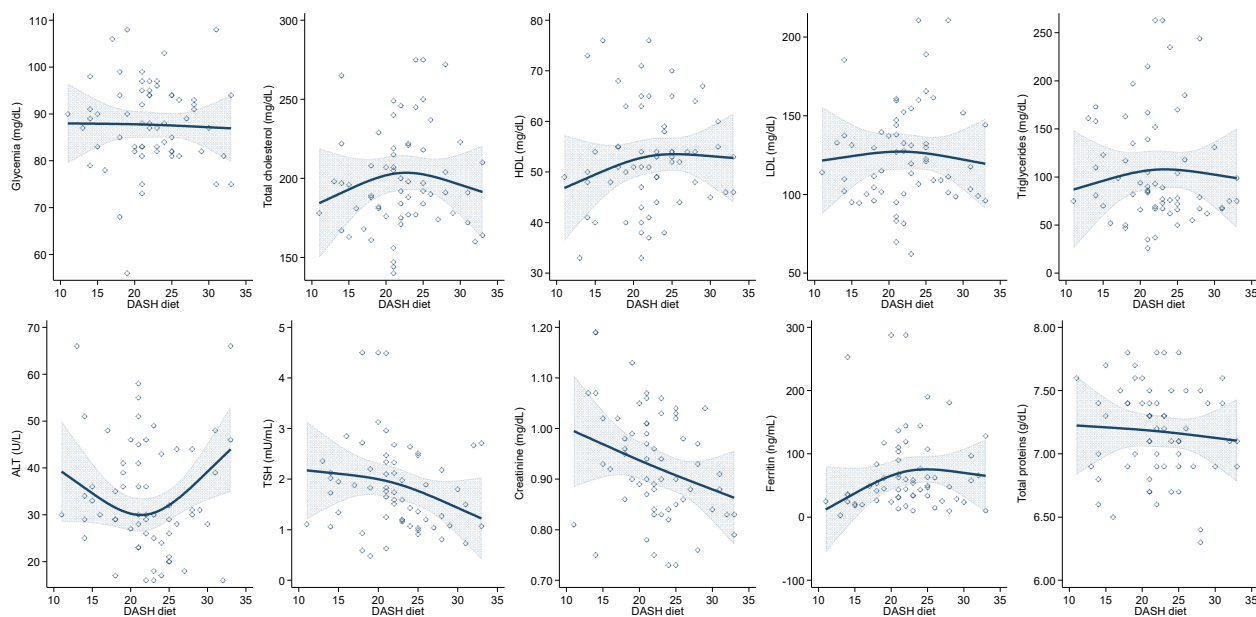

**Figure S14.** Spline regression analysis of the association between adherence to the Dietary Approaches to Stop Hypertension (DASH) diet with levels of metabolic parameters in men. Solid line indicates multivariable analysis adjusted for age, body mass index, urinary cotinine, alcohol intake, fiber intake and total energy intake, while shaded area represents confidence interval with upper and lower limits.

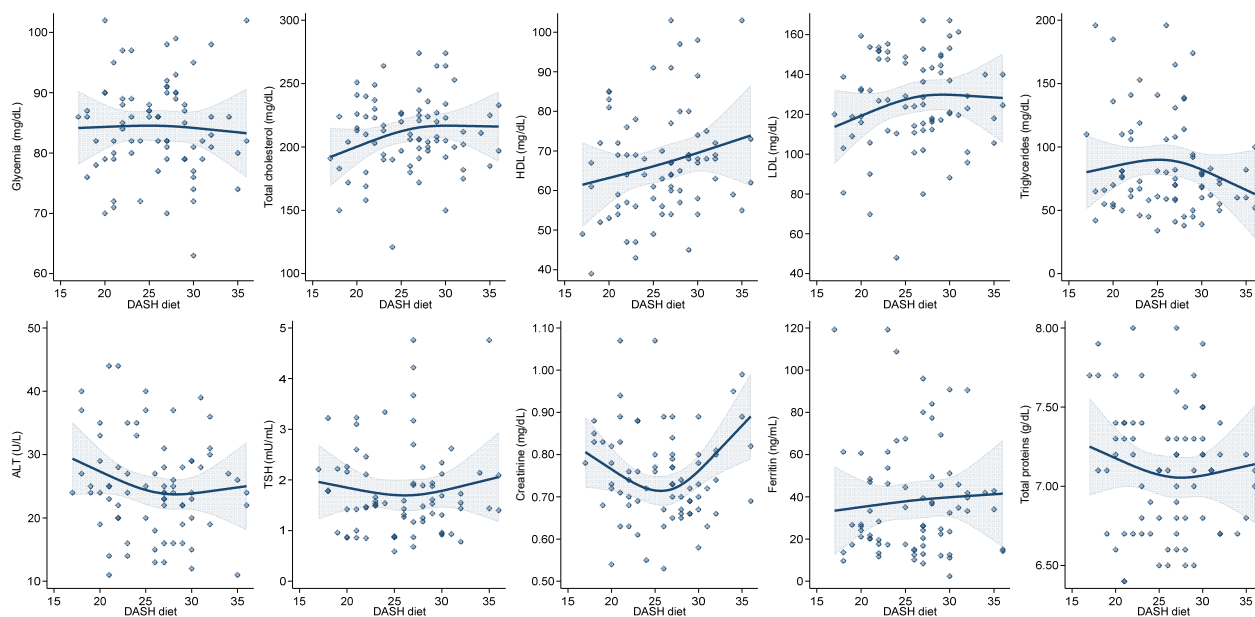

**Figure S15.** Spline regression analysis of the association between adherence to the Dietary Approaches to Stop Hypertension (DASH) diet with levels of metabolic parameters in women. Solid line indicates multivariable analysis adjusted for age, body mass index, urinary cotinine, alcohol intake, fiber intake and total energy intake, while shaded area represents confidence interval with upper and lower limits.

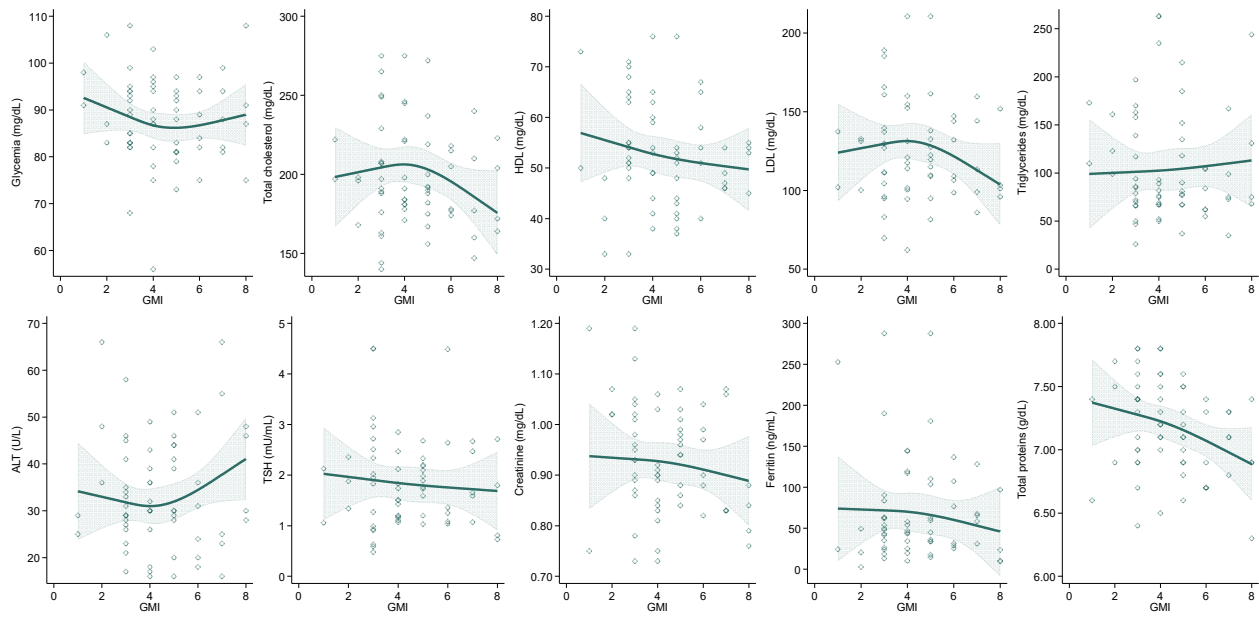

**Figure S16.** Spline regression analysis of the association between adherence to the Greek Mediterranean Index (GMI) with levels of metabolic parameters in men. Solid line indicates multivariable analysis adjusted for age, body mass index, urinary cotinine, alcohol intake, fiber intake and total energy intake, while shaded area represents confidence interval with upper and lower limits.

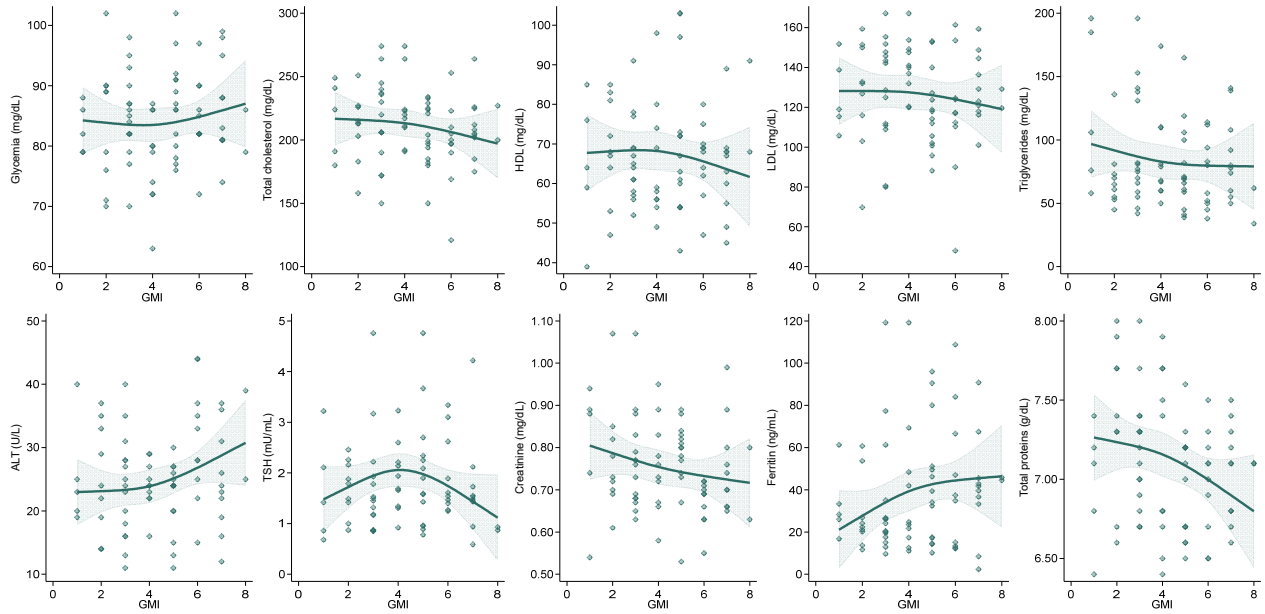

**Figure S17.** Spline regression analysis of the association between adherence to the Greek Mediterranean Index (GMI) with levels of metabolic parameters in women. Solid line indicates multivariable analysis adjusted for age, body mass index, urinary cotinine, alcohol intake, fiber intake and total energy intake, while shaded area represents confidence interval with upper and lower limits.



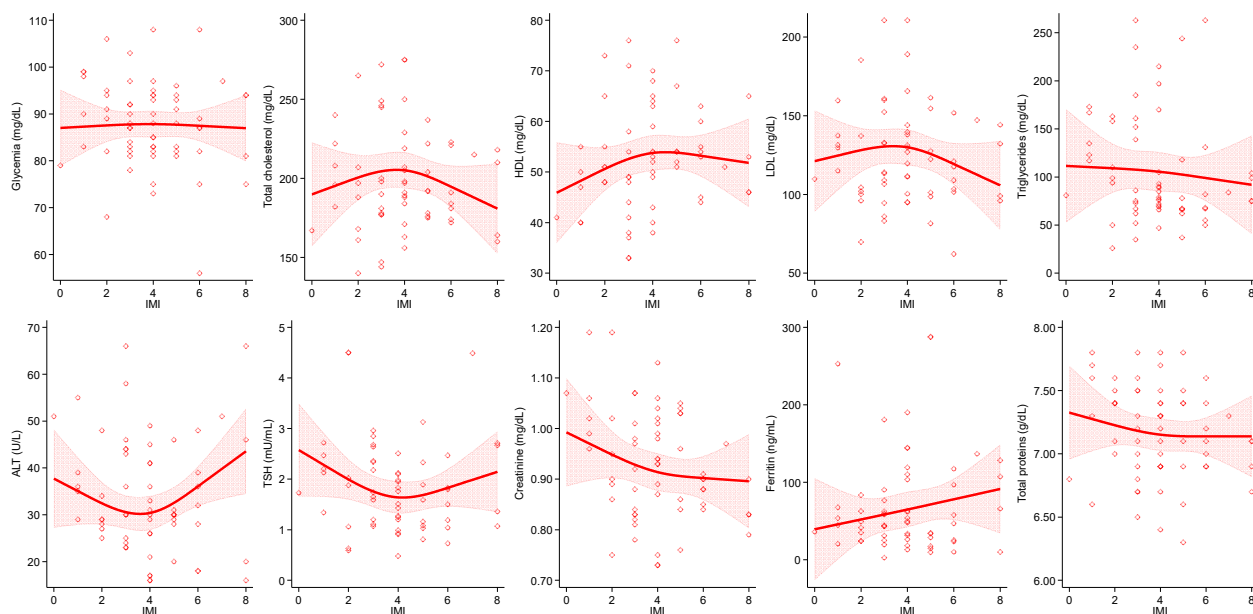

**Figure S18.** Spline regression analysis of the association between adherence to the Italian Mediterranean Index (IMI) with levels of metabolic parameters in men. Solid line indicates multivariable analysis adjusted for age, body mass index, urinary cotinine, alcohol intake, fiber intake and total energy intake, while shaded area represents confidence interval with upper and lower limits.

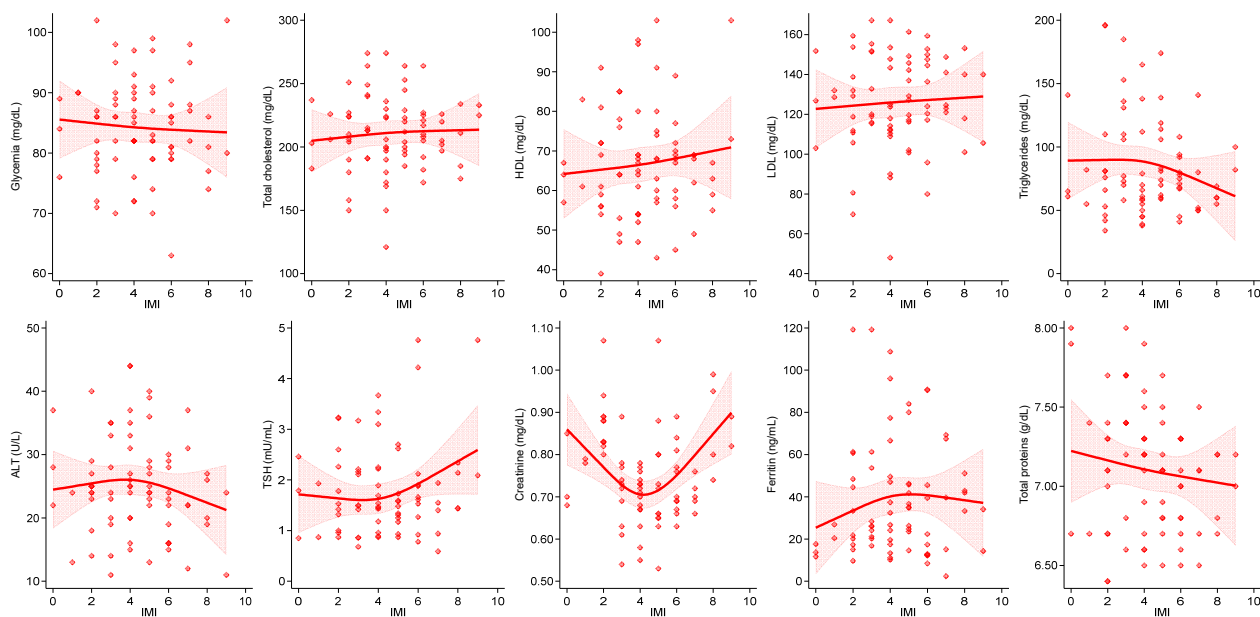

**Figure S19.** Spline regression analysis of the association between adherence to the Italian Mediterranean Index (IMI) with levels of metabolic parameters in women. Solid line indicates multivariable analysis adjusted for age, body mass index, urinary cotinine, alcohol intake, fiber intake and total energy intake, while shaded area represents confidence interval with upper and lower limits.

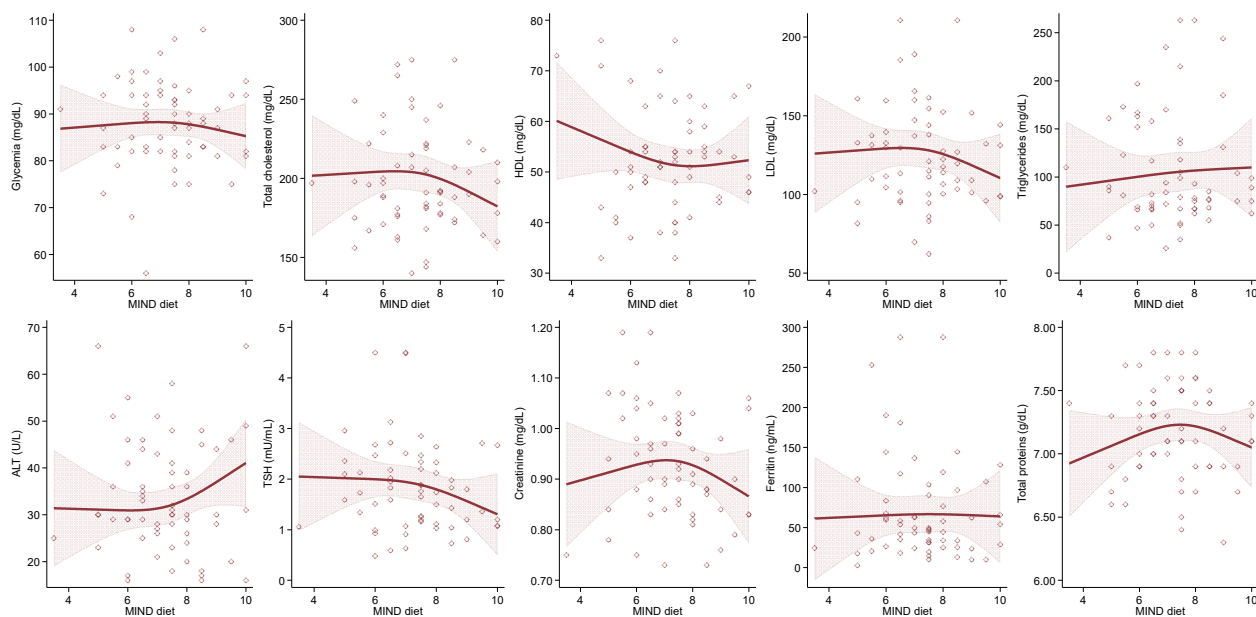

**Figure S20.** Spline regression analysis of the association between adherence to the Mediterranean-DASH Intervention for Neurodegenerative Delay (MIND) diet with levels of metabolic parameters in men. Solid line indicates multivariable analysis adjusted for age, body mass index, urinary cotinine, alcohol intake, fiber intake and total energy intake, while shaded area represents confidence interval with upper and lower limits.

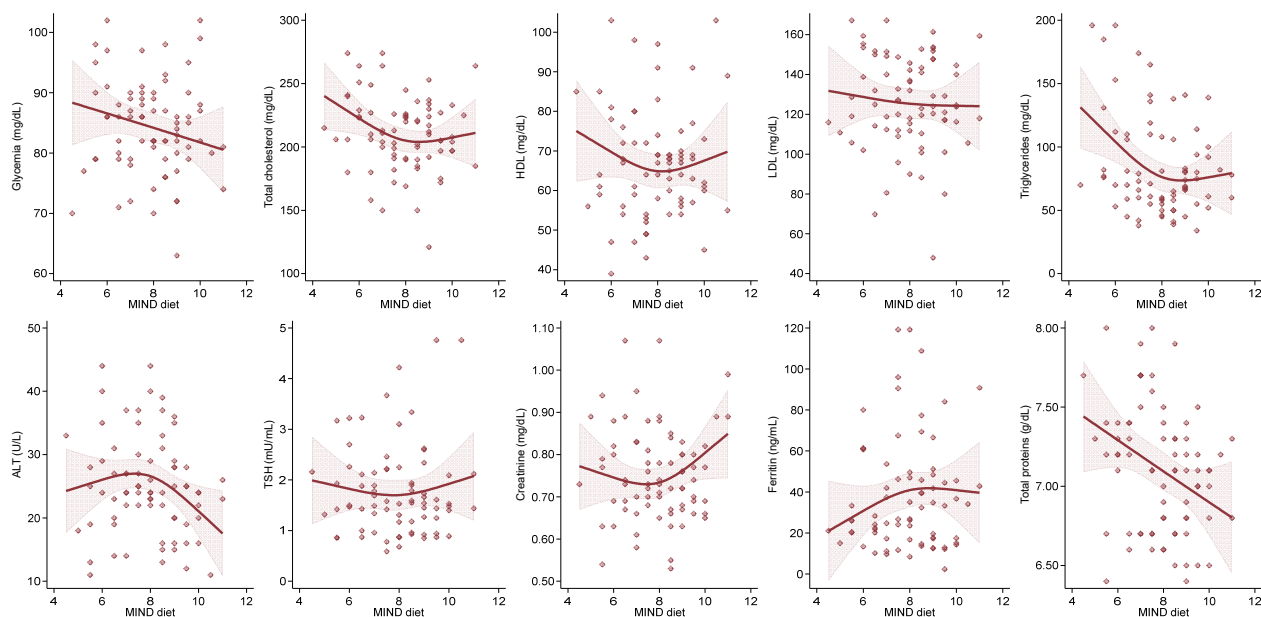

**Figure S21.** Spline regression analysis of the association between adherence to the Mediterranean-DASH Intervention for Neurodegenerative Delay (MIND) diet with levels of metabolic parameters in women. Solid line indicates multivariable analysis adjusted for age, body mass index, urinary cotinine, alcohol intake, fiber intake and total energy intake, while shaded area represents confidence interval with upper and lower limits.

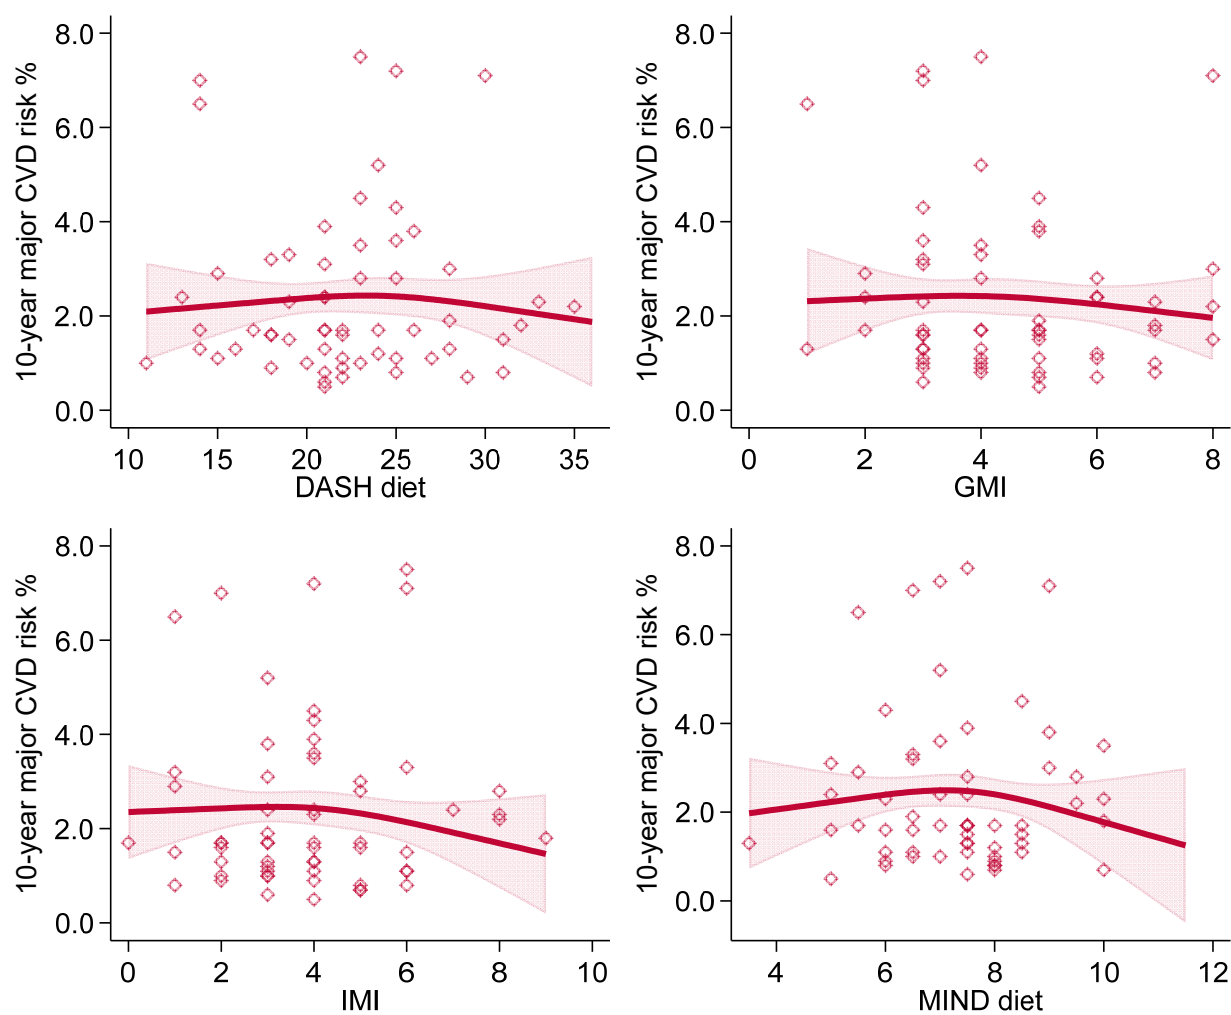

**Figure S22.** Spline regression analysis of the association between adherence to dietary patterns (Dietary Approaches to Stop Hypertension-DASH diet; Greek Mediterranean Index-GMI; Italian Mediterranean Index-IMI; Mediterranean-DASH Intervention for Neurodegenerative Delay-MIND diet) and 10-year risk of major cardiovascular events (10-year CVD risk) in men. Solid line spline analysis. Shaded area represents confidence interval with upper and lower limits.

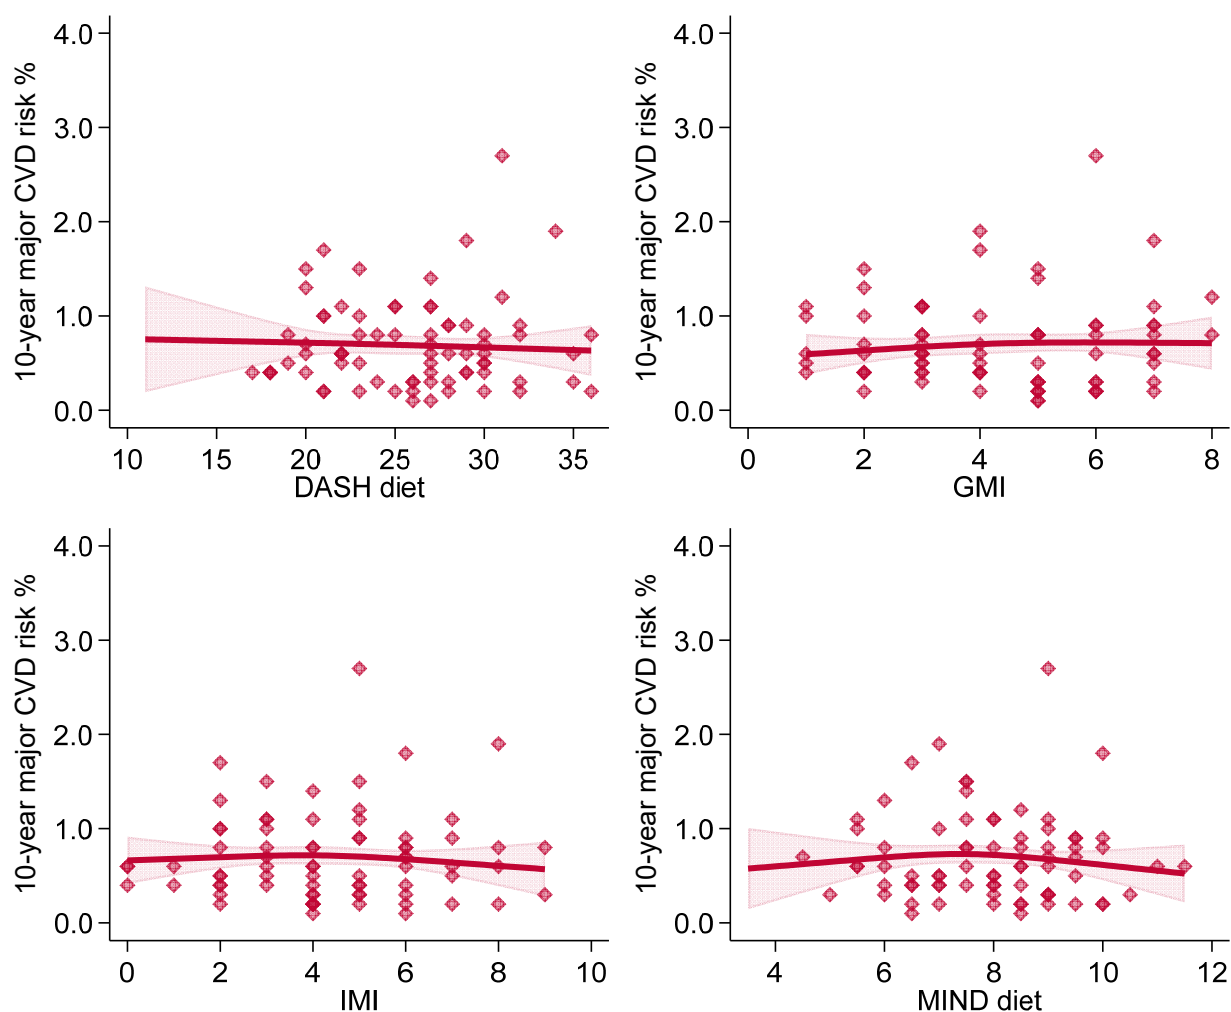

**Figure S23.** Spline regression analysis of the association between adherence to dietary patterns (Dietary Approaches to Stop Hypertension-DASH diet; Greek Mediterranean Index-GMI; Italian Mediterranean Index-IMI; Mediterranean-DASH Intervention for Neurodegenerative Delay-MIND diet) and 10-year risk of major cardiovascular events (10-year CVD risk) in women. Solid line spline analysis. Shaded area represents confidence interval with upper and lower limits.
